# Supplementary material
Source: PubMed Central journal article supplement (PMC4432152)
Supplement: AAC.00197-15_zac006153976so1.pdf [file AAC.00197-15_zac006153976so1.pdf]

**SUPPLEMENTAL TABLES**  
**HOTT ET AL., 2015**  
**PHENOTYPES OF ARTEMISININ-RESISTANT MALARIA**

**Table S1.** Characterization of *P. falciparum* isolates and clones used in this study. *In vitro* susceptibility was assessed in the T<sub>0</sub> assay for artemisinin drugs and by using standard methods for mefloquine. Results represent ≥ 2 biological replicates for the drug susceptibility assays.

TF = Treatment Failure

Thailand  
Cambodia

| Parasite Information |                 |                    |                                 | IC50, nM (±SD) |                |             |                     |               | SNPs Associated with Resistance |                 |                       |                  |                  |
|----------------------|-----------------|--------------------|---------------------------------|----------------|----------------|-------------|---------------------|---------------|---------------------------------|-----------------|-----------------------|------------------|------------------|
|                      |                 |                    |                                 |                |                |             |                     |               | Takala-Harrison et al, 2013     |                 | Cheeseman et al, 2012 |                  |                  |
| Parasite ID          | Collection site | Date of Collection | In vivo clearance 1/2 life (hr) | Artemisinin    | Artelinic Acid | Artesunate  | Dihydro-artemisinin | Mefloquine    | MAL10 (688956)                  | MAL13 (1718319) | MAL13-220 (660)       | MAL13-239 (1646) | MAL13-405 (3142) |
| <b>W2</b>            |                 |                    |                                 | 10.4 (±3.2)    | 22.6 (±8.6)    | 4.9 (±1.7)  | 3.7 (±2.2)          | 8.2 (±3.9)    | T                               | T               | A                     | T                | G                |
| <b>D6</b>            |                 |                    |                                 | 3.3 (±0.4)     | 6.7 (±1.6)     | 1.0 (±0.3)  | 0.5 (±0.1)          | 2.5 (±0.5)    | T                               | T               | A                     | T                | G                |
| ARC08-19             | Tasan           | 9-Sep-08           | 4.09                            | 14.6 (±5.5)    | 33.5 (±10.7)   | 3.8 (±0.6)  | 2.7 (±1.4)          | 38.2 (±3.3)   |                                 |                 | A                     | T                | G                |
| ARC08-22             | Tasan           |                    | 6.92                            | 27.9 (±11.6)   | 50.6 (±9.4)    | 6.8 (±2.1)  | 6.6 (±1.9)          | 49.0 (±22.3)  | A                               | A               | A                     | T                | G                |
| ARC08-32             | Tasan           |                    | 2.58                            | 35.5 (±12.2)   | 59.6 (±14.3)   | 10.6 (±1.7) | 13.3 (±11.9)        | 52.8 (±18.2)  | T                               | A               | A                     | T                | G                |
| ARC08-34             | Tasan           | 27-Oct-08          | 3.60                            | 15.4 (±2.1)    | 22.2 (±4.1)    | 4.0 (±0.6)  | 3.2 (±0.5)          | 23.6 (±19.2)  |                                 |                 | A                     | T                | G                |
| ARC08-36             | Tasan           |                    | 7.21                            | 9.9 (±1.1)     | 24.3 (±3.1)    | 6.1 (±0.5)  | 4.0 (±0.4)          | 9.4 (±1.8)    |                                 |                 |                       |                  |                  |
| ARC08-39             | Tasan           | 10-Nov-08          | 1.48                            | 14.1 (±1.1)    | 28.7 (±1.0)    | 4.1 (±0.4)  | 3.4 (±0.2)          | 53.4 (±6.6)   | T                               | A               | A                     | T                | G                |
| ARC08-63             | Tasan           |                    | 7.60                            | 28.1 (±19.9)   | 42.6 (±24.2)   | 7.6 (±1.1)  | 6.5 (±1.5)          | 44.9 (±24.4)  |                                 | A               | A                     | T                | G                |
| ARC08-88             | Tasan           |                    | TF*                             | 18.8 (±8.0)    | 43.7 (±16.6)   | 6.2 (±2.1)  | 5.7 (±3.1)          | 44.5 (±29.8)  |                                 | A               | A                     | T                | G                |
| PL08-004             | Pailin          | 18-Apr-08          | 4.04                            | 20.2 (±8.4)    | 25.4 (±4.4)    | 6.4 (±0.9)  | 6.0 (±1.8)          | 49.7 (±37.8)  |                                 |                 | A                     | T                | G                |
| PL08-009             | Pailin          |                    | 5.30                            | 38.7 (±11.9)   | 74.0 (±9.1)    | 12.0 (±4.0) | 8.0 (±4.8)          | 67.1 (±20.4)  | A                               | A               | A                     | T                | G                |
| PL08-015             | Pailin          | 21-Apr-08          | 5.15                            | 16.7 (±6.7)    | 15.9 (±8.7)    | 4.7 (±1.5)  | 4.7 (±4.0)          | 43.6 (±20.5)  |                                 |                 | A                     | T                | G                |
| PL08-025             | Pailin          |                    | 13.07                           | 17.0 (±4.8)    | 34.9 (±6.0)    | 9.0 (±2.8)  | 7.0 (±2.4)          | 9.3 (±1.3)    | T                               | A               | A                     | T                | G                |
| Cam5 (SC031)         | Pailin          | 1-Aug-07           | N/A                             | 9.7 (±4.1)     | 14.6 (±7.2)    | 3.4 (±1.3)  | 3.1 (±1.2)          | 36.3 (±20.5)  | T                               | T               | A                     | T                | G                |
| NHP2065              | Mae Sot         |                    | 6.67                            | 19.6 (±9.8)    | 27.8 (±16.8)   | 10.0 (±6.0) | 11.2 (±6.1)         | 61.2 (±13.7)  | T                               | T               | G                     | T                | G                |
| NHP4197              | Mae Sot         |                    | 2.18                            | 39.9 (±8.8)    | 57.5 (±12.8)   | 6.9 (±0.7)  | 5.0 (±1.3)          | 70.7 (±13.3)  | T                               | T               |                       |                  |                  |
| NHP4306              | Mae Sot         |                    | 1.83                            | 17.3 (±10.4)   | 33.5 (±8.1)    | 5.1 (±2.7)  | 3.2 (±1.5)          | 65.1 (±21.6)  | T                               | T               | A                     | T                | G                |
| Thai 13 (FARS012)    | Mae Sot         | 1-Feb-08           | 3.18                            | 23.5 (±3.7)    | 43.6 (±8.8)    | 4.6 (±1.9)  | 3.8 (±0.6)          | 125.2 (±27.6) |                                 |                 | A                     | T                | G                |
| Thai 14 (ARS40)      | Mae Sot         | 1-Apr-08           | 1.90                            | 22.7 (±8.6)    | 30.0 (±1.0)    | 4.3 (±0.8)  | 3.9 (±0.1)          | 113.3 (±25.8) |                                 |                 | A                     | T                | G                |
| Thai 22 (ARS014)     | Mae Sot         | 1-Feb-08           | 3.63                            | 20.5 (±7.4)    | 34.8 (±1.3)    | 4.9 (±1.4)  | 4.2 (±1.6)          | 100.1 (±18.6) | A                               | T               | A                     | T                | G                |

**SUPPLEMENTAL TABLES**  
**HOTT ET AL., 2015**  
**PHENOTYPES OF ARTEMISININ-RESISTANT MALARIA**

**Table S2.** Description of primers and conditions used in this study.

| Gene          | SNP                | Forward Primer                    | Reverse Primer                    | Sequencing Primer    | T <sub>M</sub><br>(°C) |
|---------------|--------------------|-----------------------------------|-----------------------------------|----------------------|------------------------|
| PF3D7_1343700 | C580Y              | GTCAACAATGCGYGGCGTAT              | TCACCATTAGTTCACCAATGACA<br>(BIO)  | CCAATGACATAAATTTTATT | 63.0                   |
| PF3D7_1343700 | R539T              | TTAGTCAACAATGCTGGCGTAT<br>(BIO)   | CTCCCATTAGTTCACCAATG              | AGTGGAAGACATCATGTAA  | 58.0                   |
| PF3D7_1343700 | Y493H              | TTAGTCAACAATGCTGGCGTAT<br>(BIO)   | CTCCCATTAGTTCACCAATG              | GTGCTGTATTGAATAATTC  | 58.0                   |
| PF3D7_101700  | MAL10<br>(688956)  | TGGATTGGTGAAAAGGAAAATGTA          | GGAAACATTTATGCCATCAACATT<br>(BIO) | TTTTTATAAAAGAACTATGC | 61.8                   |
| PF3D7_1343400 | MAL13<br>(1718319) | AAGACAACGGTGACGATCTAAAA<br>(BIO)  | CGTCTGCACATTTTTTACACATAA          | ATTATTTCTATATTATTCT  | 58.6                   |
| PF3D7_1344600 | MAL13<br>(660)     | CCGTATGTGAAGAAGCACAATGT<br>(BIO)  | CTAGCTCCACCATCTGGTAAATCA          | GGTAAATCATCTCTATCAAC | 63.4                   |
| PF3D7_1344700 | MAL13<br>(1646)    | TTGATAAACCTGAATGGGGACTTA<br>(BIO) | TTGATCACTCATGGGATGAAAATA          | ACTCTAATGTTTGTTCAT   | 61.6                   |
| PF3D7_1344300 | MAL13<br>(3142)    | TTTTTCATCGTGCATCTCAAAC<br>(BIO)   | TTCTAGTTGGCGTATCCTTAAAT           | TTTGATTAGGGTACACATAA | 59.0                   |

**SUPPLEMENTAL TABLES**  
**HOTT ET AL., 2015**  
**PHENOTYPES OF ARTEMISININ-RESISTANT MALARIA**

**Table S3.** Compilation of Pf3D7\_1343700 (K13) sequence results for *P. falciparum* isolates and clones used in this study.

| Parasite          | In vivo clearance<br>1/2 life | TAC-->CAC<br>Y493H | GAT-->GTT<br>D584V | TGT-->TAT<br>C580Y | ATT-->ACT<br>I543T | AGA-->ACA<br>R539T | AAT-->ATT<br>N537I | GGT-->AGT<br>G533S |
|-------------------|-------------------------------|--------------------|--------------------|--------------------|--------------------|--------------------|--------------------|--------------------|
| W2                |                               | WT                 |
| D6                |                               | WT                 |
| CB132             |                               | WT                 |
| CB137             |                               | WT                 |
| ARC08-19          | 4.09                          | WT                 | WT                 | WT                 |                    |                    |                    |                    |
| ARC08-22          | 6.92                          | WT                 | WT                 | Mut                | WT                 | WT                 | WT                 | WT                 |
| ARC08-22 (4G)     | 6.92                          | WT                 | WT                 | Mut                | WT                 | WT                 | WT                 | WT                 |
| ARC08-22 (5G)     | 6.92                          | WT                 | WT                 | Mut                | WT                 | WT                 | WT                 | WT                 |
| ARC08-22 (7C)     | 6.92                          | WT                 | WT                 | Mut                |                    |                    |                    |                    |
| ARC08-32          | 2.58                          | WT                 |
| ARC08-34          | 3.6                           | WT                 |
| ARC08-63          | 7.6                           | WT                 | WT                 | Mut                | WT                 | WT                 | WT                 | WT                 |
| ARC08-88          | TF                            | WT                 | WT                 | Mut                | WT                 | WT                 | WT                 | WT                 |
| ARC08-88 (5A)     | TF                            | WT                 | WT                 | Mut                |                    |                    |                    |                    |
| ARC08-88 (8A)     | TF                            | WT                 | WT                 | Mut                |                    |                    |                    |                    |
| ARC08-88 (9C)     | TF                            | WT                 | WT                 | Mut                |                    |                    |                    |                    |
| ARC08-88 (9D)     | TF                            | WT                 | WT                 | Mut                |                    |                    |                    |                    |
| ARC08-88 (11G)    | TF                            | WT                 | WT                 | Mut                |                    |                    |                    |                    |
| PL08-004          | 4.04                          | Mut                | WT                 | WT                 | WT                 | WT                 | WT                 | WT                 |
| PL08-009          | 5.3                           | WT                 | WT                 | Mut                | WT                 | WT                 | WT                 | WT                 |
| PL08-009 (5C)     | 5.3                           | WT                 | WT                 | Mut                |                    |                    |                    |                    |
| PL08-009 (6B)     | 5.3                           | WT                 | WT                 | Mut                |                    |                    |                    |                    |
| PL08-009 (9H)     | 5.3                           | WT                 | WT                 | Mut                |                    |                    |                    |                    |
| PL08-015          | 5.15                          | WT                 | WT                 | WT                 | WT                 | Mut                | WT                 | WT                 |
| PL08-025          | 13.07                         | WT                 | WT                 | Mut                | WT                 | WT                 | WT                 | WT                 |
| Cam5 (SC031)      | N/A                           | WT                 | WT                 | WT                 | WT                 | Mut                | WT                 | WT                 |
| NHP2065           | 6.67                          | WT                 |
| NHP2065 (4A)      | 6.67                          | WT                 |
| NHP2065 (4F)      | 6.67                          | WT                 | WT                 | WT                 |                    |                    |                    |                    |
| NHP2065 (6H)      | 6.67                          | WT                 | WT                 | WT                 |                    |                    |                    |                    |
| NHP2065 (7C)      | 6.67                          | WT                 |
| NHP4197           | 2.18                          | WT                 | WT                 | WT                 |                    |                    |                    |                    |
| NHP4197 (2A)      | 2.18                          | WT                 | WT                 | WT                 |                    |                    |                    |                    |
| NHP4306           | 1.83                          | WT                 |
| Thai 13 (FARS012) | 3.18                          | WT                 |
| Thai 14 (ARS40)   | 1.9                           | WT                 |
| Thai 22 (ARS014)  | 3.63                          | WT                 |

Note: NHP2065 contained the A675V mutation in K13 (Francois Nosten, personal communication).

**SUPPLEMENTAL FIGURES**  
**HOTT ET AL., 2015**  
**PHENOTYPES OF ARTEMISININ-RESISTANT MALARIA**

**Figure S1.** Parasite development was monitored following exposure to DHA. Parasites (n=100) were categorized as ring, trophozoite/schizont, or dormant/dead for each time point. In the delayed parasite clearance (DCA) assay *P. falciparum* clones were exposed to three, six-hour pulses of 700 nM DHA.

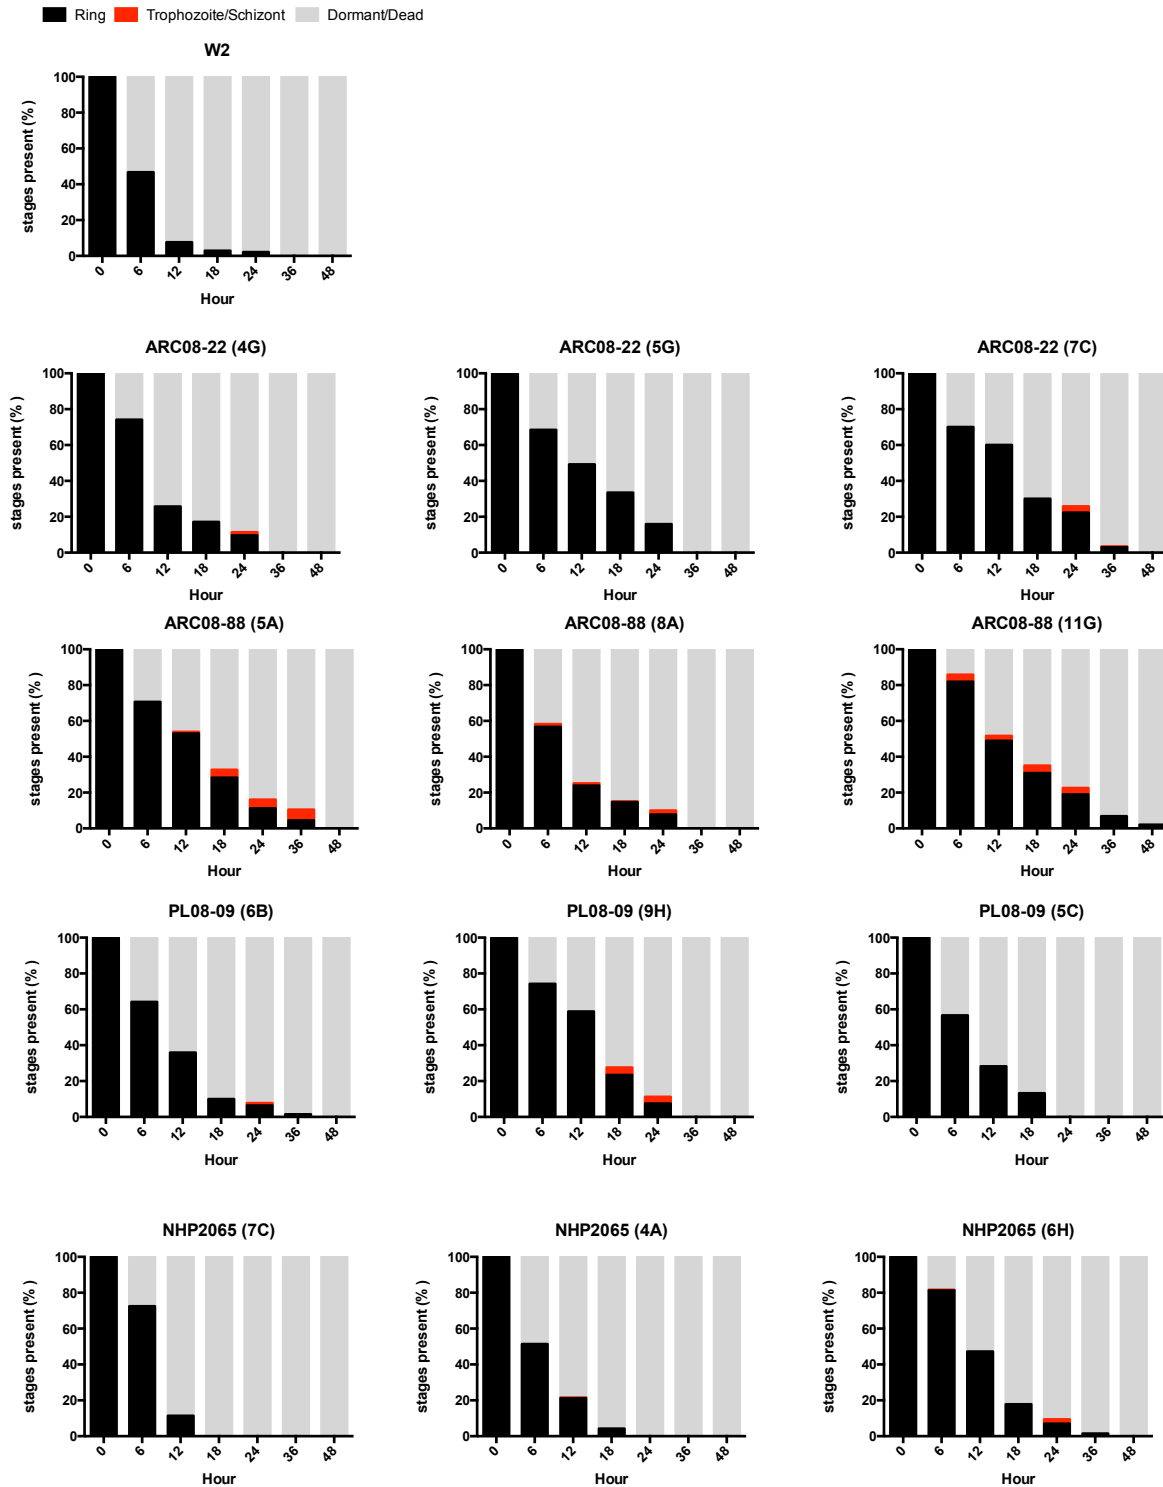

**SUPPLEMENTAL FIGURES**  
**HOTT ET AL., 2015**  
**PHENOTYPES OF ARTEMISININ-RESISTANT MALARIA**

**Figure S2.** The in vitro response ( $IC_{50}$ s) as determined in the  $T_0$   $^3H$ -hypoxanthine assay were not correlated directly to the in vitro parasite reduction ratio (PRR). The PRR data were determined from the delayed clearance assay as outlined in the methods. The presence of mutations in Pf3D7\_1343700 are noted by the symbol color (WT; C580Y; R539T; Y493H; A675V) (DHA = dihydroartemisinin; QHS = artemisinin; AS = artesunate; AL = artelinic acid).

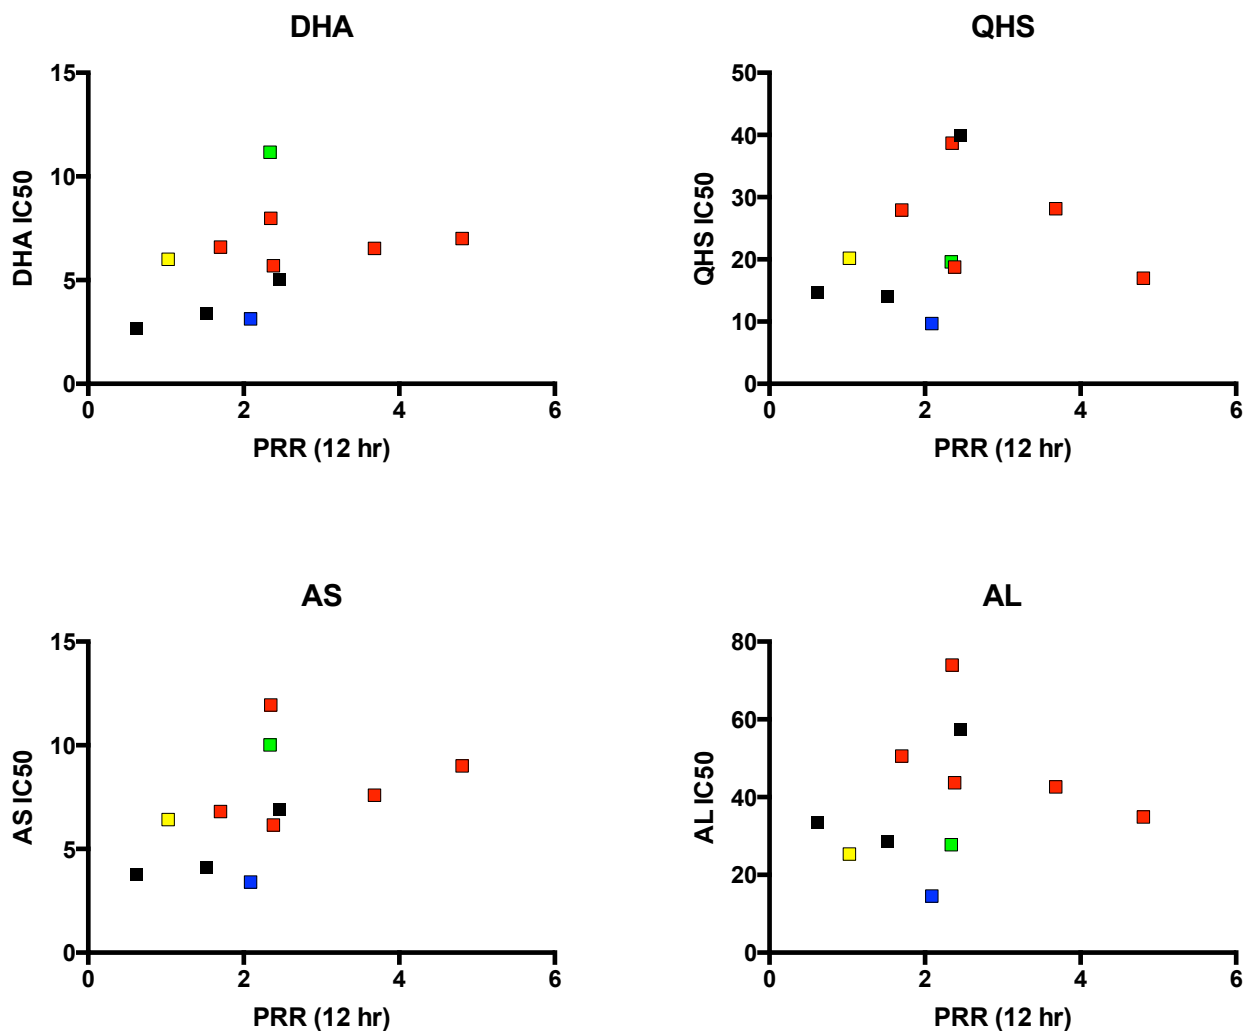

**SUPPLEMENTAL FIGURES**  
**HOTT ET AL., 2015**  
**PHENOTYPES OF ARTEMISININ-RESISTANT MALARIA**

**Figure S3. Clearance, recrudescence, and susceptibility of ARC08-22 clones compared to W2.** ARC08-22 (4G) recrudesced before W2 reaching initial parasitemia 2 days before W2. ARC08-22 (5G) and (7C) recrudesced after W2 and grew to initial parasitemia 3 and 6 days after W2, respectively. In vitro susceptibility to artemisinin derivatives was determined in the  $T_0$  assay ( $n \geq 2$  biological replicates). The time to reach starting parasitemia did not correlate with  $IC_{50}$  values to artemisinin derivative or mefloquine.

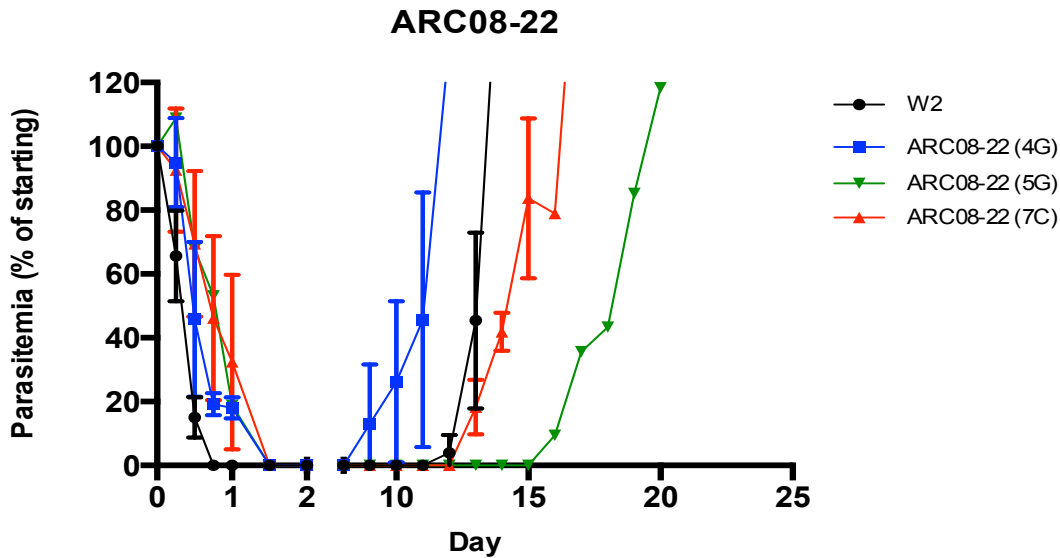

**$IC_{50}$ , nM ( $\pm$ SD)**

|                    | QHS                | AL                 | ART               | DHA               | MFQ                |
|--------------------|--------------------|--------------------|-------------------|-------------------|--------------------|
| <b>W2</b>          | 10.4 ( $\pm$ 3.2)  | 22.6 ( $\pm$ 8.6)  | 4.9 ( $\pm$ 1.7)  | 3.7 ( $\pm$ 2.2)  | 8.2 ( $\pm$ 3.9)   |
| <b>ARC08-22</b>    | 27.9 ( $\pm$ 11.6) | 50.6 ( $\pm$ 9.4)  | 6.8 ( $\pm$ 2.1)  | 6.6 ( $\pm$ 1.9)  | 49.0 ( $\pm$ 22.3) |
| <b>ARC08-22 4G</b> | 33.6 ( $\pm$ 14.0) | 48.3 ( $\pm$ 19.8) | 8.3 ( $\pm$ 2.5)  | 7.3 ( $\pm$ 1.6)  | 25.8 ( $\pm$ 13.9) |
| <b>ARC08-22 5G</b> | 42.2 ( $\pm$ 9.0)  | 60.4 ( $\pm$ 7.2)  | 10.7 ( $\pm$ 1.7) | 10.5 ( $\pm$ 3.6) | 48.5 ( $\pm$ 11.2) |
| <b>ARC08-22 7C</b> | 34.2 ( $\pm$ 11.4) | 58.8 ( $\pm$ 16.2) | 10.2 ( $\pm$ 2.7) | 8.2 ( $\pm$ 3.6)  | 51.5 ( $\pm$ 32.9) |

**SUPPLEMENTAL FIGURES**  
**HOTT ET AL., 2015**  
**PHENOTYPES OF ARTEMISININ-RESISTANT MALARIA**

**Figure S4. Clearance, recrudescence, and susceptibility of PL08-09 clones compared to W2.** PL08-09 (6B) cleared up to 24 hours slower than PL08-09 (5C) and (9H). PL08-09 (5C) and (9H) recrudescence following dormancy was not significantly delayed as compared to W2. PL08-09 (6B) took 7 days longer than W2 to reach initial parasitemia. In vitro susceptibility to artemisinin derivatives was determined in the  $T_0$  assay ( $n \geq 2$  biological replicates). The time to reach starting parasitemia did not correlate with  $IC_{50}$  values to artemisinin derivative or mefloquine.

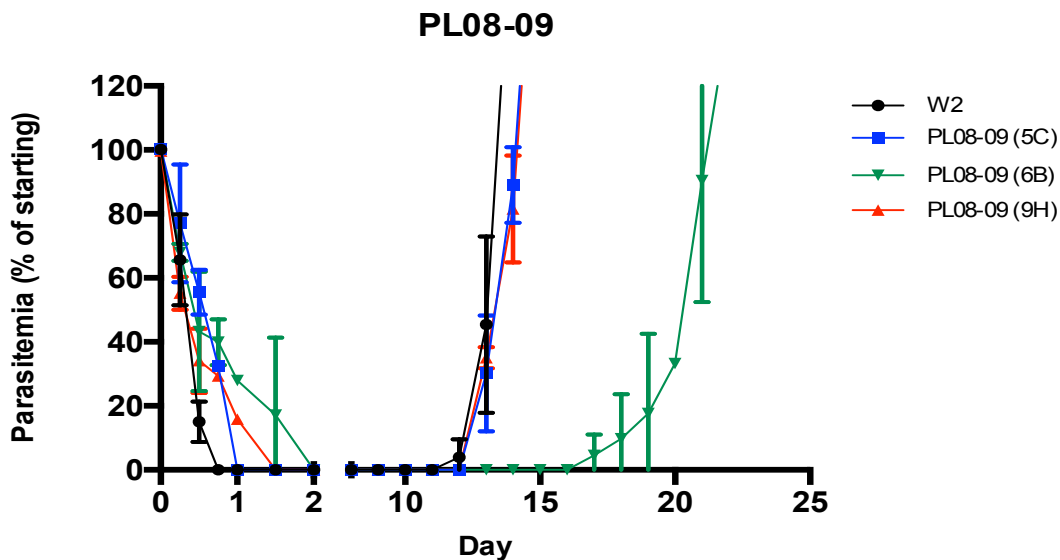

**$IC_{50}$ , nM ( $\pm$ SD)**

|                   | QHS                | AL                  | ART               | DHA              | MFQ                |
|-------------------|--------------------|---------------------|-------------------|------------------|--------------------|
| <b>W2</b>         | 10.4 ( $\pm$ 3.2)  | 22.6 ( $\pm$ 8.6)   | 4.9 ( $\pm$ 1.7)  | 3.7 ( $\pm$ 2.2) | 8.2 ( $\pm$ 3.9)   |
| <b>PL08-09</b>    | 38.7 ( $\pm$ 11.9) | 74.0 ( $\pm$ 9.1)   | 12.0 ( $\pm$ 4.0) | 8.0 ( $\pm$ 4.8) | 67.1 ( $\pm$ 20.4) |
| <b>PL08-09 6B</b> | 25.3 ( $\pm$ 5.5)  | 51.4 ( $\pm$ 10.5)  | 6.9 ( $\pm$ 1.3)  | 5.3 ( $\pm$ 1.5) | 70.4 ( $\pm$ 6.6)  |
| <b>PL08-09 9H</b> | 38.7 ( $\pm$ 15.6) | 70.5 ( $\pm$ 24.2)  | 11.4 ( $\pm$ 4.4) | 7.1 ( $\pm$ 1.1) | 89.0 ( $\pm$ 48.2) |
| <b>PL08-09 5C</b> | 72.9 (0.02)        | 116.1 ( $\pm$ 10.1) | 12.6 ( $\pm$ 2.2) | 8.0 ( $\pm$ 2.5) | 53.5 ( $\pm$ 3.1)  |

**SUPPLEMENTAL FIGURES**  
**HOTT ET AL., 2015**  
**PHENOTYPES OF ARTEMISININ-RESISTANT MALARIA**

**Figure S5. Clearance, recrudescence, and susceptibility of NHP2065 clones compared to W2.** NHP2065 (7C) cleared at a similar rate as W2 and began to recrudescence around the same time as W2. NHP2065 (6H) and (4A) cleared 18 hours after W2 and recrudescenced 2 and 7 days after W2 respectively. In vitro susceptibility to artemisinin derivatives was determined in the  $T_0$  assay ( $n \geq 2$  biological replicates). All NHP2065 clones tested are more susceptible to artemisinin derivatives compared to other patient clones tested but are resistant to mefloquine. NHP2065 is the only isolate in this study with the A675V mutation in K13 (Francois Nosten, personal communication).

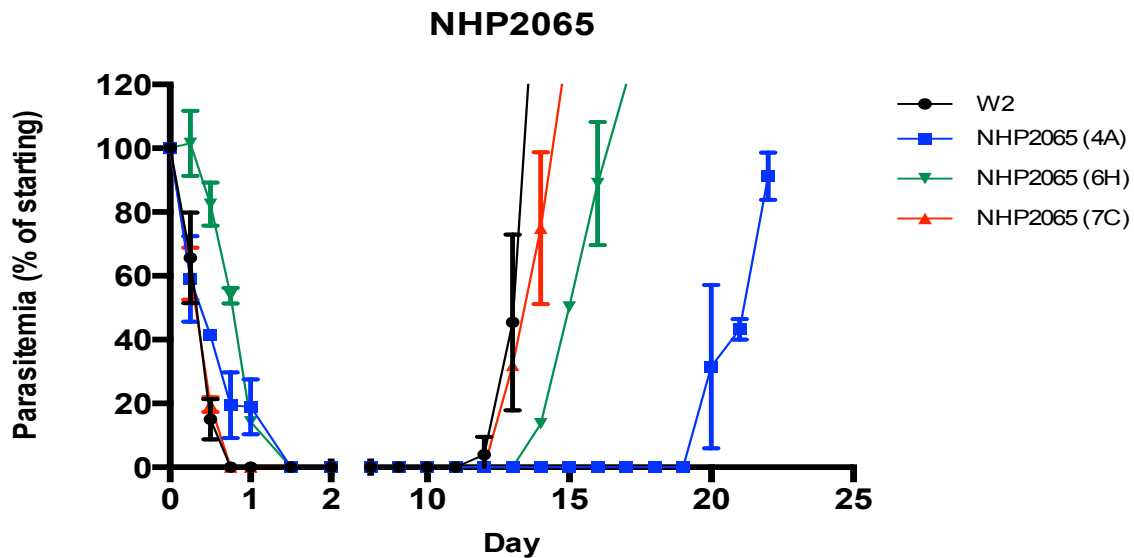

**IC<sub>50</sub>, nM (+SD)**

|            | QHS         | AL           | ART         | DHA         | MFQ          |
|------------|-------------|--------------|-------------|-------------|--------------|
| W2         | 10.4 (±3.2) | 22.6 (±8.6)  | 4.9 (±1.7)  | 3.7 (±2.2)  | 8.2 (±3.9)   |
| NHP2065    | 19.6 (±9.8) | 27.8 (±16.8) | 10.0 (±6.0) | 11.2 (±6.1) | 61.2 (±13.7) |
| NHP2065 4A | 15.2 (±4.0) | 25.1 (±7.7)  | 3.4 (±1.3)  | 5.1 (±1.0)  | 48.1 (±5.3)  |
| NHP2065 7C | 14.6 (±1.0) | 19.0 (±3.7)  | 3.4 (±0.7)  | 5.4 (±1.5)  | 61.4 (±18.2) |
| NHP2065 6H | 16.6 (±8.2) | 18.4 (±5.5)  | 2.7 (±0.9)  | 3.7 (±0.8)  | 33.9 (±21.8) |
